# Supplementary material for: Al conductive haloaluminate-free non-aqueous room-temperature electrolytes
Source: Royal Society of Chemistry journal article supplement (doi:10.1039/c5ta01760b), 2015-01-01
Supplement: c5ta01760b1.pdf [file c5ta01760b1.pdf]

Supporting Information for:

# ***Al Conductive Haloaluminate-free Non-aqueous Room-Temperature Electrolytes***

†Department of Applied Physics, Chalmers University of Technology, SE-412 96 Göteborg, Sweden

‡Current position: Visiting professor at LRCS/CNRS UMR7314, Université de Picardie Jules Verne,  
33 rue Saint Leu, 80039 Amiens, France

CORRESPONDING AUTHOR FOOTNOTES

Telephone: +46-31-772-3310, E-mail: [mandi@chalmers.se](mailto:mandi@chalmers.se)

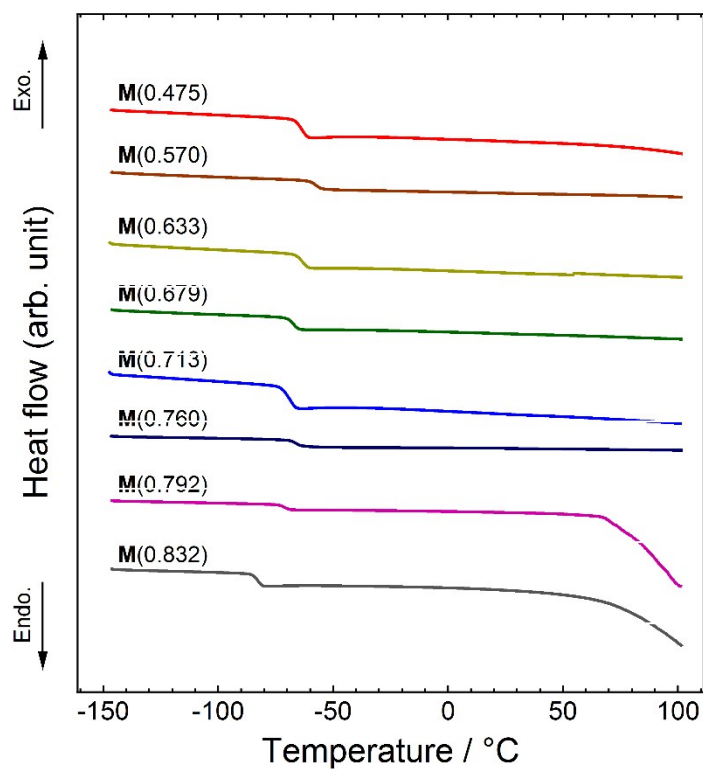

**Fig. S1** DSC traces of the ternary electrolytes. A scan rate of 10 K min<sup>-1</sup> was employed.

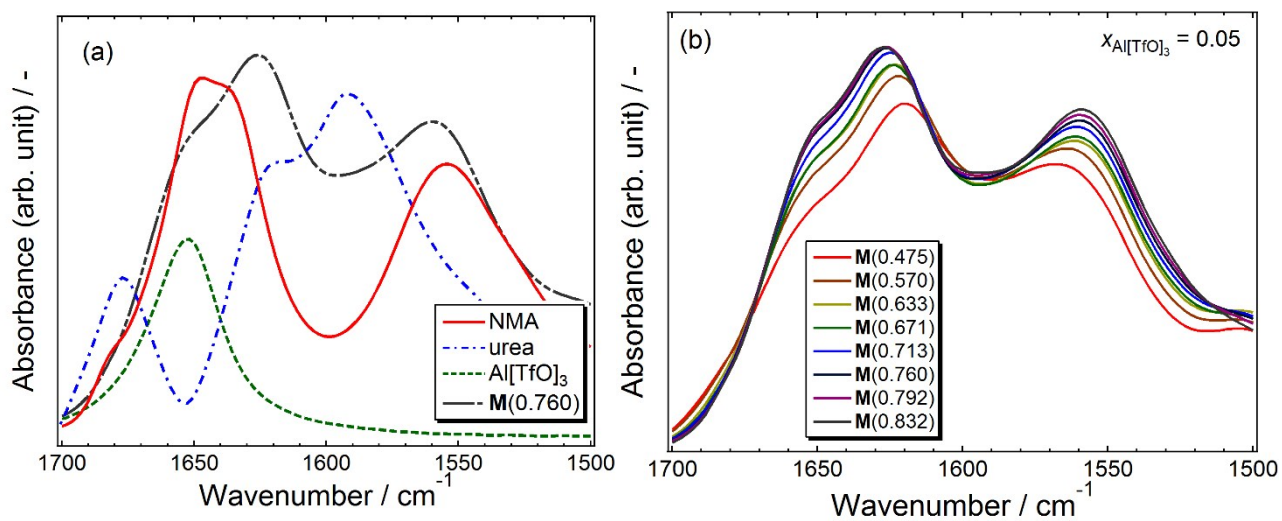

**Fig. S2** FT-IR spectra in the range of 1700–1500 cm<sup>-1</sup> for pure components and ternary electrolytes. (a) NMA, urea, Al[TfO]<sub>3</sub>, and M(0.760); (b) different ternary electrolytes with  $x_{\text{NMA}} = 0.475\text{--}0.832$ .
